# Supplementary material for: Stochastic Boolean networks: An efficient approach to modeling gene regulatory networks
Source: PubMed Central journal article supplement (PMC3532238; doi:10.1186/1752-0509-6-113), 2012-08-28
Supplement: 1752-0509-6-113-S4.pdf [file 1752-0509-6-113-S4.pdf]

# Stochastic Boolean Networks: An Efficient Approach to Modeling Gene Regulatory Networks

**Jinghang Liang<sup>1</sup>, Jie Han<sup>1§</sup>**

<sup>1</sup>Department of Electrical and Computer Engineering, University of Alberta,

Edmonton, AB, Canada T6G 2V4

<sup>§</sup>Corresponding author

Email addresses:

JL: [Jinghang@ualberta.ca](mailto:Jinghang@ualberta.ca)

JH: [jhan8@ualberta.ca](mailto:jhan8@ualberta.ca)

## Additional file 2.

### Truth Table of the PBN Inferred from the T Cell

### Microarray Time Series Data

Based on the activation and inhibition relationships in the T cell network in Fig. 9 [1],

the following single-input Boolean functions are obtained using the proposed SBN

rules:

$$\mathbf{g}_1 = \text{not}(\mathbf{g}_6),$$

$$\mathbf{g}_3 = \mathbf{g}_2,$$

$$\mathbf{g}_4 = \text{not}(\mathbf{g}_2),$$

$$\mathbf{g}_5 = \text{not}(\mathbf{g}_3),$$

$$\mathbf{g}_7 = \mathbf{g}_3,$$

$$\mathbf{g}_8 = \text{not}(\mathbf{g}_5),$$

$$\mathbf{g}_{10} = \mathbf{g}_{11},$$

$$\mathbf{g}_{12} = \text{not}(\mathbf{g}_8).$$

For  $\mathbf{g}_2$ ,  $\mathbf{g}_6$ ,  $\mathbf{g}_9$  and  $\mathbf{g}_{11}$ , their Boolean functions are determined by multiple inputs,

as shown as follows.

1. The state of  $g_2$  is determined by the states of three genes:  $g_2$ ,  $g_3$  and  $g_6$ .

Truth Table for  $g_2$ :  $f_1^{(2)} = \text{or}(g_2, g_6)$ ,  $f_2^{(2)} = \text{or}(g_3, g_6)$ .

| $g_2g_3g_6$ | $f_1^{(2)}$ | $f_2^{(2)}$ |
|-------------|-------------|-------------|
| 000         | 0           | 0           |
| 001         | 1           | 1           |
| 010         | 0           | 1           |
| 011         | 1           | 1           |
| 100         | 1           | 0           |
| 101         | 1           | 1           |
| 110         | 1           | 1           |
| 111         | 1           | 1           |
| $c_j^{(i)}$ | 0.5         | 0.5         |

2. The state of  $g_6$  is determined by five genes:  $g_1, g_9, g_{11}, g_{12}$  and  $g_{10}$ .

Truth Table for  $g_6$ :  $f_1^{(6)} = \text{and}(\text{or}(g_1, g_9, g_{11}, g_{12}), \text{not}(g_{10}))$ ,  $f_2^{(6)} = \text{not}(g_{10})$ .

| $g_{10}g_1g_9g_{11}g_{12}$ | $f_1^{(6)}$ | $f_2^{(6)}$ |
|----------------------------|-------------|-------------|
| 00000                      | 0           | 1           |
| 00001                      | 1           | 1           |
| 00010                      | 1           | 1           |
| 00011                      | 1           | 1           |
| 00100                      | 1           | 1           |
| 00101                      | 1           | 1           |
| 00110                      | 1           | 1           |
| 00111                      | 1           | 1           |
| 01000                      | 1           | 1           |
| 01001                      | 1           | 1           |
| 01010                      | 1           | 1           |
| 01011                      | 1           | 1           |
| 01100                      | 1           | 1           |
| 01101                      | 1           | 1           |
| 01110                      | 1           | 1           |
| 01111                      | 1           | 1           |
| 10000                      | 0           | 0           |
| 10001                      | 0           | 0           |
| 10010                      | 0           | 0           |
| 10011                      | 0           | 0           |
| 10100                      | 0           | 0           |
| 10101                      | 0           | 0           |
| 10110                      | 0           | 0           |
| 10111                      | 0           | 0           |
| 11000                      | 0           | 0           |
| 11001                      | 0           | 0           |
| 11010                      | 0           | 0           |
| 11011                      | 0           | 0           |
| 11100                      | 0           | 0           |
| 11101                      | 0           | 0           |
| 11110                      | 0           | 0           |
| 11111                      | 0           | 0           |
| $c_j^{(i)}$                | 0.8         | 0.2         |

3. The state of  $g_9$  is determined by the states of three genes:  $g_4, g_5$  and  $g_{12}$ .

Truth table for  $g_9$ :  $f_1^{(9)} = \text{or}(g_4, g_{12})$ ,  $f_2^{(9)} = \text{or}(g_5, g_{12})$ .

| $g_4 g_5 g_{12}$ | $f_1^{(9)}$ | $f_2^{(9)}$ |
|------------------|-------------|-------------|
| 000              | 0           | 0           |
| 001              | 1           | 1           |
| 010              | 0           | 1           |
| 011              | 1           | 1           |
| 100              | 1           | 0           |
| 101              | 1           | 1           |
| 110              | 1           | 1           |
| 111              | 1           | 1           |
| $c_j^{(i)}$      | 0.5         | 0.5         |

4. The state of  $g_{11}$  is determined by the states of four genes,  $g_6, g_4, g_5$  and  $g_7$ .

Truth table for  $g_{11}$ :  $f_1^{(11)} = \text{and}(\text{or}(g_7, \text{nor}(g_4, g_5)), \text{not}(g_6))$ ,

$f_2^{(11)} = \text{and}(\text{nor}(g_4, g_5), \text{not}(g_6))$ ,

$f_3^{(11)} = \text{and}(g_7, \text{not}(g_6))$ ,  $f_4^{(11)} = \text{not}(g_6)$ .

| $g_6g_4g_5g_7$ | $f_1^{(11)}$ | $f_2^{(11)}$ | $f_3^{(11)}$ | $f_4^{(11)}$ |
|----------------|--------------|--------------|--------------|--------------|
| 0000           | 1            | 1            | 0            | 1            |
| 0001           | 1            | 1            | 1            | 1            |
| 0010           | 0            | 0            | 0            | 1            |
| 0011           | 1            | 0            | 1            | 1            |
| 0100           | 0            | 0            | 0            | 1            |
| 0101           | 1            | 0            | 1            | 1            |
| 0110           | 0            | 0            | 0            | 1            |
| 0111           | 1            | 0            | 1            | 1            |
| 1000           | 0            | 0            | 0            | 0            |
| 1001           | 0            | 0            | 0            | 0            |
| 1010           | 0            | 0            | 0            | 0            |
| 1011           | 0            | 0            | 0            | 0            |
| 1100           | 0            | 0            | 0            | 0            |
| 1101           | 0            | 0            | 0            | 0            |
| 1110           | 0            | 0            | 0            | 0            |
| 1111           | 0            | 0            | 0            | 0            |
| $c_j^{(i)}$    | 0.185        | 0.37         | 0.148        | 0.297        |

## References

1. Martin, S., Zhang, Z., Martino, A. and Faulon, J-L.: **Boolean dynamics of genetic regulatory networks inferred from microarray time series data.**  
*Bioinformatics*, 2007, 23(7): 866-874.
